# Supplementary material for: Bio-Based Nanoparticles as a Carrier of β-Carotene: Production, Characterisation and In Vitro Gastrointestinal Digestion
Source: PubMed Central journal article supplement (PMC7582681; doi:10.3390/molecules25194497), 2020-09-30
Supplement: molecules-25-04497-s001.pdf [file molecules-25-04497-s001.pdf]

## Supplementary information

**Table S1.** Average size and polydispersity (PDI) of ethylcellulose nanoparticles

| <b>Ethylcellulose<br/>Concentration (%)</b> | <b>Antisolvent<br/>Concentration (%)</b> | <b>Average Size<br/>(nm)</b> | <b>PDI</b> |
|---------------------------------------------|------------------------------------------|------------------------------|------------|
| 0.1                                         | 60                                       | 163.6                        | 0.20       |
| 0.1                                         | 80                                       | 99.83                        | 0.29       |
| 0.4                                         | 60                                       | 258.3                        | 0.24       |
| 0.4                                         | 80                                       | 187.5                        | 0.25       |
| 0.2                                         | 70                                       | 166.3                        | 0.15       |
| 0.2                                         | 70                                       | 193.8                        | 0.14       |
| 0.2                                         | 70                                       | 188.2                        | 0.17       |

**Table S2.** Average size and polydispersity (PDI) of zein nanoparticles

| <b>Zein<br/>Concentration<br/>(%)</b> | <b>Antisolvent<br/>Concentration<br/>(%)</b> | <b>Flow Rate<br/>(mL/min)</b> | <b>Average Size<br/>(nm)</b> | <b>PDI</b> |
|---------------------------------------|----------------------------------------------|-------------------------------|------------------------------|------------|
| 0.4                                   | 80                                           | 0.3                           | 131.0                        | 0.21       |
| 0.4                                   | 80                                           | 0.7                           | 136.7                        | 0.20       |
| 0.4                                   | 90                                           | 0.3                           | 91.0                         | 0.23       |
| 0.4                                   | 90                                           | 0.7                           | 95.5                         | 0.29       |
| 0.8                                   | 80                                           | 0.3                           | 156.1                        | 0.18       |
| 0.8                                   | 80                                           | 0.7                           | 162.3                        | 0.21       |
| 0.8                                   | 90                                           | 0.3                           | 104.5                        | 0.24       |
| 0.8                                   | 90                                           | 0.7                           | 104.1                        | 0.29       |
| 0.6                                   | 85                                           | 0.5                           | 142.9                        | 0.22       |
| 0.6                                   | 85                                           | 0.5                           | 116.7                        | 0.22       |
| 0.6                                   | 85                                           | 0.5                           | 125.5                        | 0.23       |
